# Supplementary material for: The initial U3 snoRNA:pre-rRNA base pairing interaction required for pre-18S rRNA folding revealed by in vivo chemical probing
Source: PubMed Central journal article supplement — Nucleic Acids Res. 2011 Feb 23;39(12):5164–80. doi: 10.1093/nar/gkr044 (PMC3130255; doi:10.1093/nar/gkr044), 2011-02-23
Supplement: supp_gkr044_Supplemental_Data_NAR.pdf [file supp_gkr044_Supplemental_Data_NAR.pdf]

Supporting Data

# The initial U3 snoRNA:pre-rRNA base-pairing interaction required for pre-18S rRNA folding revealed by in vivo chemical probing

Laura M Dutca<sup>1,‡</sup>, Jennifer E.G. Gallagher<sup>2,\*</sup> and Susan J. Baserga<sup>1,2,3,#</sup>

<sup>1</sup>Depts. of Molecular Biophysics & Biochemistry

<sup>2</sup>Genetics

<sup>3</sup>Therapeutic Radiology

Yale University School of Medicine, New Haven, CT 06520, USA

<sup>‡</sup> current address: Iowa City Department of Veteran Affairs Center for Prevention and Treatment of Visual Loss, Iowa City, IA 52246, USA

\*current address: Department of Genetics, Stanford University, Stanford CA 94305, USA

<sup>#</sup>To whom correspondence should be addressed. E-mail: [susan.baserga@yale.edu](mailto:susan.baserga@yale.edu)

Running head: Initial base-pairing of U3 snoRNA to pre-rRNA

Keywords: ribosome biogenesis, U3 snoRNA, RNA folding, in vivo chemical probing

**Supplementary Figure S1.** Expression of the U3 snoRNA results in altered in vivo DMS reactivity of the nucleotides near the 5'-end pseudoknot of the 18S rRNA. DMS was added at 16 h after shifting the yeast to dextrose to deplete the endogenous U3 snoRNA. Yeast either contained a plasmid that expressed the tagged U3 snoRNA (+U3; U3 WT) or an empty vector (-U3; EV). Total RNA was extracted from unmodified (Un) and modified (+DMS) yeast and analyzed by primer extension with the following primers (A) 82-18S, a dark and a light exposure are shown; (B) 129-18S; (C) 227-18S; (D) 1063-18S and (E) 1169-18S. Lanes A and G are dideoxy sequencing lanes, and the nts are indicated on the left side of the gels. The numbering starts at the 5' end of the 18S rRNA. Parentheses indicate numbering from the start site of transcription. The purple boxes highlight the nts involved in the formation of the 5' end pseudoknot.

**Supplementary Figure S2.** Summary of the results from in vivo DMS modification of the 18S rRNA sequences near the 5' pseudoknot with and without the U3 snoRNA (data shown in Figure 4). Nucleotides with altered reactivity as a result of the presence of the U3 snoRNA, as compared to absence of the U3 snoRNA, are shown on the secondary structure of the 18S rRNA "<http://www.rna.ccbb.utexas.edu/>". Blue circles denote nts with lower reactivity, while red circles denote nts with higher reactivity. The size of the dot represents the intensity of the change. The purple boxes highlight the nts involved in the formation of the 5' end pseudoknot.

Supplementary Figure S1

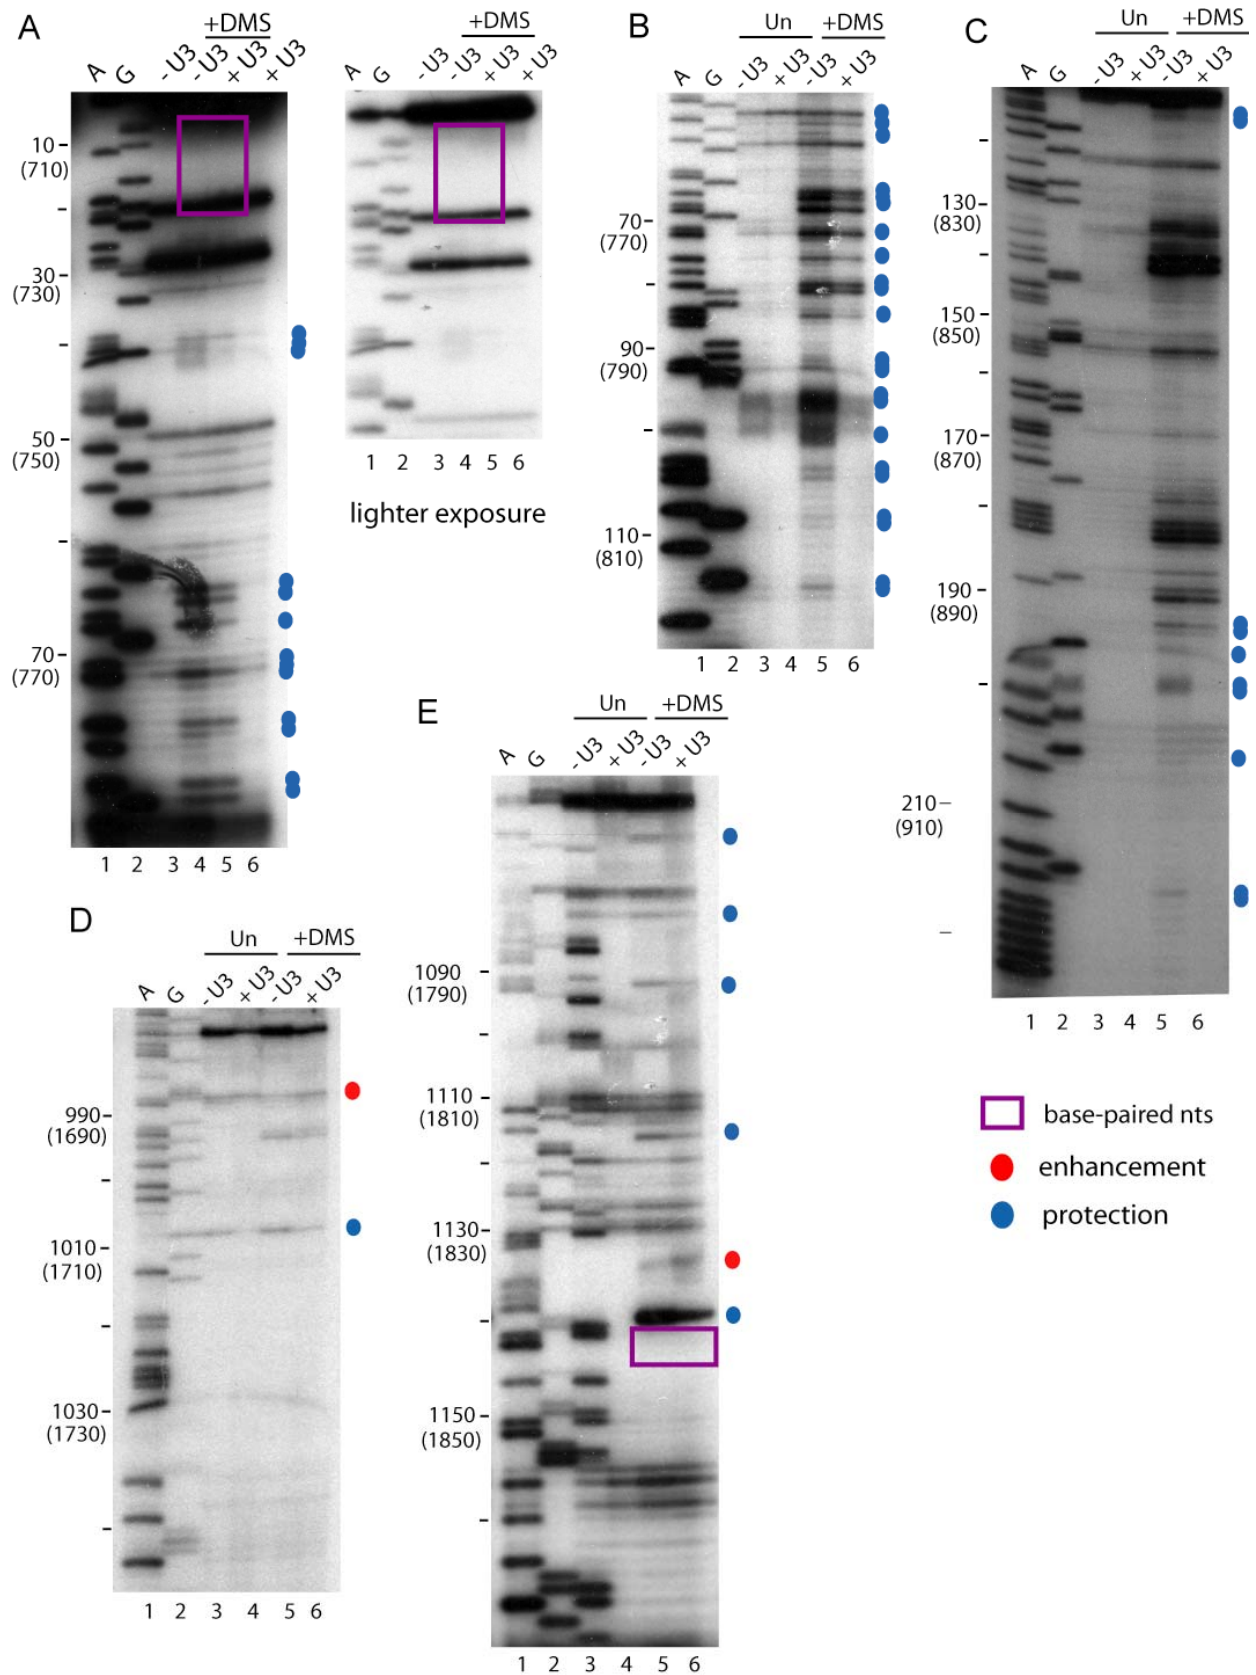

Supplementary Figure S2

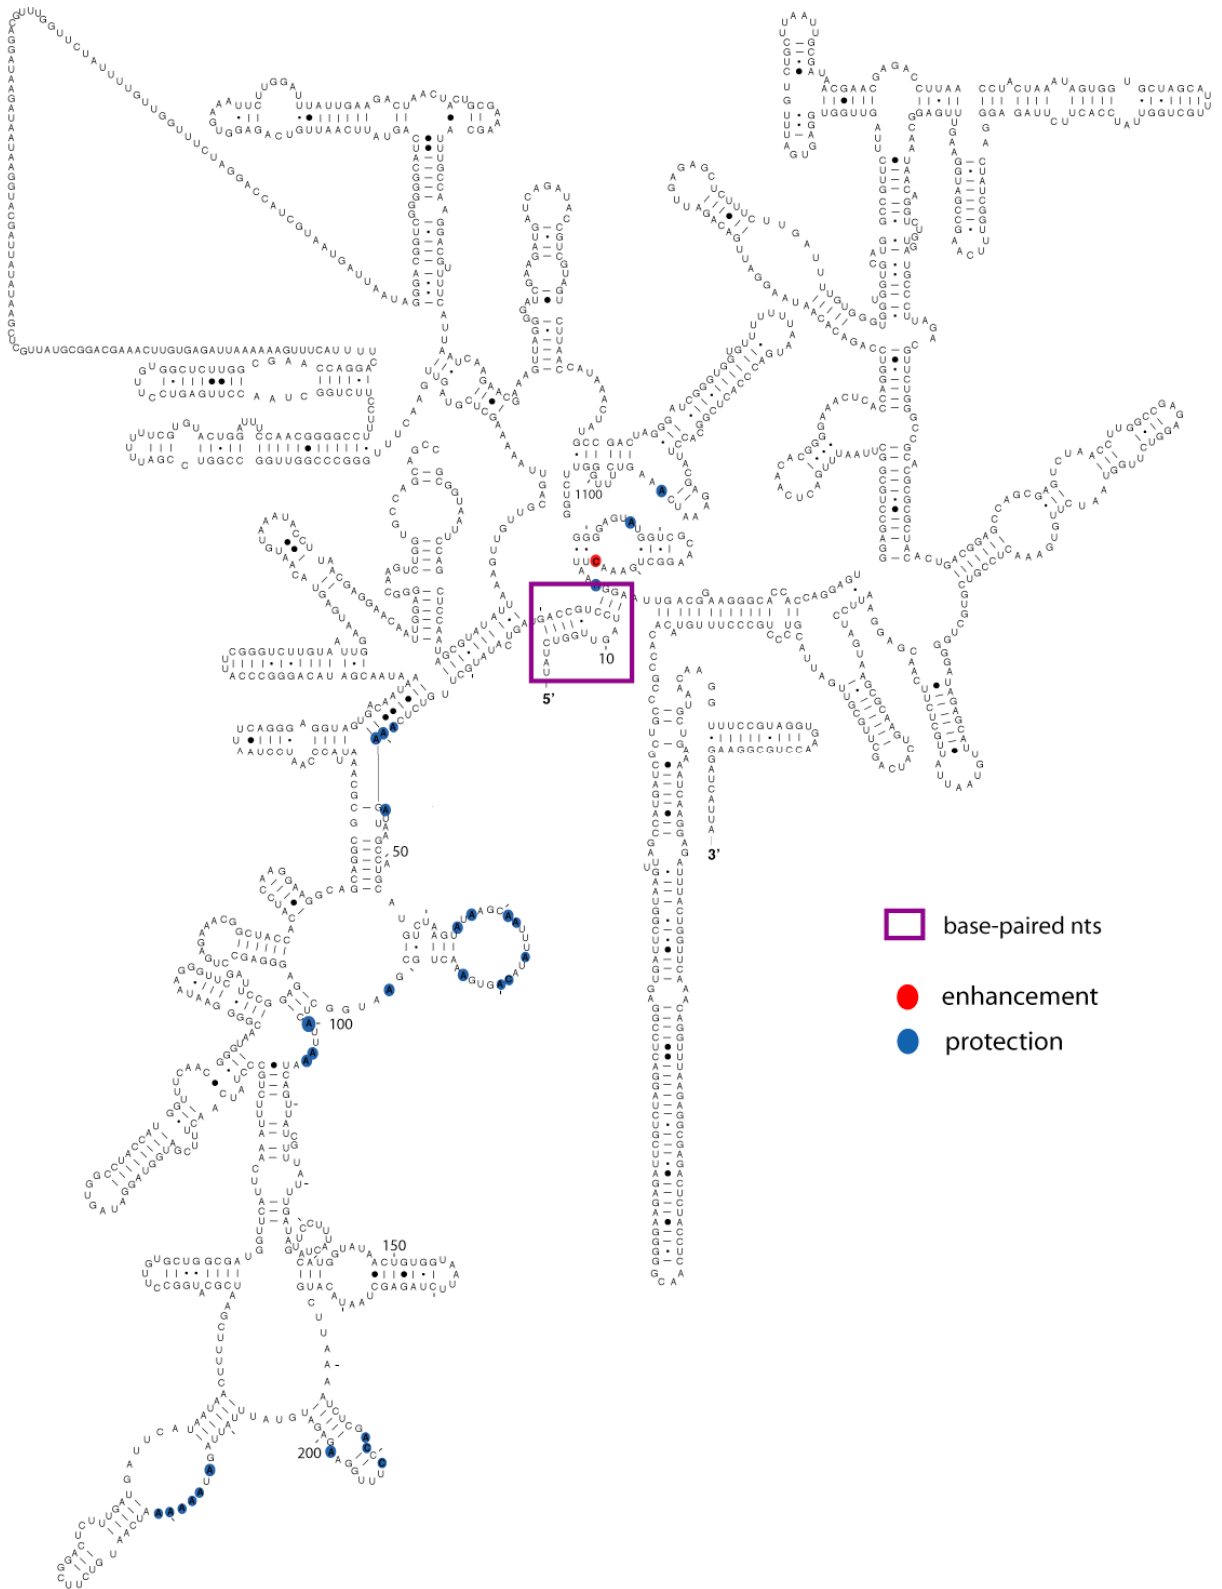

**Supplementary Table S1.** List of plasmids expressing the mutant U3 snoRNAs and the pre-rRNA used in these studies. All the U3 snoRNA genes were cloned into either pRS313 (HIS marker) or pRS314 (TRP marker). The U3 snoRNAs carry a unique sequence for detection purposes (see Figure 1 and Experimental Procedures).

| Plasmid                                                   | Mutations in U3 snoRNA                                                         | Reference                                                                                                                       |
|-----------------------------------------------------------|--------------------------------------------------------------------------------|---------------------------------------------------------------------------------------------------------------------------------|
| pRS31X (EV)<br>pRS313 (HIS marker)<br>pRS314 (TRP marker) |                                                                                |                                                                                                                                 |
| pRS313 U3WT<br><br>pRS314 U3WT                            | Tagged U3 snoRNA                                                               | pRU3* (Samarsky and Fournier, 1998; Wormsley et al., 2001)<br>pTRP- <i>U3<sup>tag</sup></i> [ <i>wt</i> ] (Wehner et al., 2002) |
| pRS313 U3 5H<br>pRS314 U3 5H                              | nt 41-46 mutated from GAGAAA to ACTTCT                                         | based on (Beltrame and Tollervey, 1995)                                                                                         |
| pRS313 U3 BoxA<br>pRS314 U3 BoxA                          | nt 15 to 31 mutated from TAGGATCATTTCTATAG to ATCCTAGTAAAGATATC                | pRU3*[box A:subst](Wormsley et al., 2001)<br>this study                                                                         |
| pRS313 U3-63<br>pRS314 U3-63                              | 63 nt from 5' end deleted                                                      | pRU3*[-63](Wormsley et al., 2001)<br>this study                                                                                 |
| pRS313 U3-72<br><br>pRS314 U3-72                          | 72 nt from 5' end deleted                                                      | pRU3*[-72] (Samarsky and Fournier, 1998; Wormsley et al., 2001)<br>this study                                                   |
| pRS314 U3 3H7                                             | nt 64 to 70 mutated from ACTGAAT to GTCATTA                                    | this study                                                                                                                      |
| pRS313 U3 3H11<br>pRS314 U3 3H11                          | nt 62 to 72 mutated from CCACTGAATCC to AGGTCATTAGG                            | this study                                                                                                                      |
| YEP24 (URA marker)                                        |                                                                                |                                                                                                                                 |
| pNOY102 (URA marker)                                      |                                                                                | (Nogi et al., 1991)                                                                                                             |
| pNOY102 ETS3H11                                           | Pre-rRNA nts 281-286 and 289-291 mutated from GGAUU and GUGG to CCTAA and AUCT | this study                                                                                                                      |

**Supplementary Table S2.** List of oligonucleotides used for site directed mutagenesis, northern blotting and primer extension.

| Oligonucleotide | Sequence                                                                               | Reference                         |
|-----------------|----------------------------------------------------------------------------------------|-----------------------------------|
| 5ETS6U3s        | 5'-TACTTCATAGGATCATTCTATAGGAATCGTCATGA<br>AGAGCTCTTCAAAGAGCCACTGAATCCAACCTTGG-3'       |                                   |
| 5ETS6U3as       | 5'-<br>CCAAGTTGGATTTCAGTGGCTCTTTTGAAGAGTCTCTTCAT<br>GACGATTCCATAGAAATGATCCTATGAAGTA-3' |                                   |
| U3hingemut7s    | 5'-GAATCGTCACTCTTTGACTCTTCAAAGAGCCGTCAT<br>TACCAACTTGGTTGATGAGTCCCATAACCTTTGT-3'       |                                   |
| U3hingemut7as   | 5'-TGTTTCCAATACCCTGAGTAGTTGGTTCAACCATTAC<br>TGCCGAGAAAACCTTCTCAGTTTCTCACTGCTAAG-3'     |                                   |
| U3hingemut9s    | 5'-GAATCGTCACTCTTTGACTCTTCAAAGAGCCGTCATT<br>AGGAACCTGGTTGATGAGTCCCATAACCTTTGT-3'       |                                   |
| U3hingemut9as   | 5'-TGTTTCCAATACCCTGAGTAGTTGGTTCAAGGATTACT<br>GCCGAGAAAACCTTCTCAGTTTCTCACTGCTAAG-3'     |                                   |
| SD74            | 5'-ATCAAGATCATCGCGCCGGTTTCTCACTCTGG<br>GGTAC-3'                                        | (Samarsky and<br>Fournier, 1998)  |
| SD13            | 5'-GCGGCTTAGGCTAAGCTAAGGCCAGC                                                          | (Samarsky and<br>Fournier, 1998)  |
| U14             | 5'-CGATGGGTTTCGTAAGCGTACTCCTACCGTGG-3'                                                 |                                   |
| 157-5'ETS       | 5'-CTCAATACGCATCAACCCATGTC-3'                                                          |                                   |
| 276-5'ETS       | 5'-GCTAGTAATCCACCAAATCCTTC-3'                                                          |                                   |
| 400-5'ETS       | 5'-GGAATGGTACGTTTGATATCGCT-3'                                                          |                                   |
| 500-5'ETS       | 5'-TTACTCTTGACCAGCG-3'                                                                 |                                   |
| 542-5'ETS       | 5'TTCAGGTCTCTCTGCTGCCGG-3'                                                             |                                   |
| 611-5'ETS       | 5'-CCACCTATCCCTCTTGCTAGAAG-3'                                                          |                                   |
| 693-5'ETS       | 5'-GGATCAACCAGATAACTATCTTAA-3'                                                         | (Beltrame and<br>Tollervey, 1992) |
| 82-18S          | 5'-AATGAGCCATTCGCAGTTTC-3'                                                             |                                   |
| 129-18S         | 5'-CCACGGTTATACCATGTAGTAAAGG-3'                                                        |                                   |
| 227-18S         | 5'GAATCATCAAAGAGTCCGAAGAC-3'                                                           |                                   |
| 388-18S         | 5'-TATCGCTGATTTGAGAGG-3'                                                               |                                   |
| 1063-18S        | 5'-TCGTAAGGTGCCGAGTGGGTC-3'                                                            |                                   |
| 1169-18S        | 5'-GTGTTGAGTCAAATTAGCCGCAGG-3'                                                         |                                   |

**Supplementary Table S3.** Summary of changes in chemical reactivity of 5'ETS nts in the presence of the mutated U3 snoRNAs, as compared to the absence of the U3 snoRNA as a reference point. E indicates an enhancement and its relative strength is indicated by e or EE, from weakest to strongest. P indicates a protection and its relative strength is indicated by p or P, from weakest to strongest.

| Nucleotide | U3 WT | U3 5H | U3 Box A | U3 3H7 | U3 3H11 |
|------------|-------|-------|----------|--------|---------|
| A 295      | EE    | EE    | EE       | EE     |         |
| C300       | p     |       |          |        |         |
| A303       | E     | E     | E        | E      |         |
| C311       | EE    | EE    | EE       | EE     |         |
| A313       | e     |       |          | e      |         |
| C317       | E     | E     | E        | E      |         |
| A319       | e     | e     | e        | e      |         |
| C330       | p     |       |          |        |         |
| A452       | e     |       |          | e      |         |
| C454       | e     |       |          | e      |         |
| A461       | p     |       | p        | p      |         |
| C469       | P     |       | p        | P      |         |
| C471       | p     |       | p        | p      |         |
| A472       | p     |       | p        | p      |         |
| A473       | p     |       | p        | p      |         |
| A474       | p     |       | p        | p      |         |
| A476       | p     |       | p        | p      |         |
| A605       | E     |       | e        | e      |         |
| A638       | p     |       | p        | p      |         |
| A639       | P     | p     | P        | P      |         |
| A640       | p     |       | p        | p      |         |

**Supplementary Table S4.** Changes in chemical reactivity of the 18S rRNA region of the 35S pre-rRNA when U3WT is expressed. The numbers in parenthesis correspond to numbering from the start site of transcription. Strength of modification is indicated as in Table S3. The numbering is from the 5' end of the 18S rRNA.

| Nucleotide   | Reactivity |
|--------------|------------|
| A39 (739)    | p          |
| A40 (740)    | P          |
| A41 (741)    | P          |
| A43 (743)    | P          |
| A65 (765)    | P          |
| A67 (767)    | P          |
| A71 (771)    | P          |
| A72 (772)    | p          |
| A76 (776)    | p          |
| C79 (779)    | p          |
| A80 (780)    | P          |
| A84 (784)    | P          |
| A92 (792)    | P          |
| A100 (800)   | PP         |
| A103 (803)   | P          |
| A104 (804)   | P          |
| A138 (838)   | P          |
| A188 (888)   | p          |
| C189 (889)   | p          |
| C191 (891)   | p          |
| A215 (1015)  | P          |
| A217 (1017)  | p          |
| A218 (1018)  | p          |
| A219 (1019)  | p          |
| A220 (1020)  | p          |
| A221 (1021)  | p          |
| A1091 (1791) | P          |
| A1116 (1816) | P          |
| C1134 (1834) | e          |
| A1139 (1839) | P          |
